# Supplementary material for: Activation of the same mGluR5 receptors in the amygdala causes divergent effects on specific versus indiscriminate fear
Source: eLife. 2017 May 30;6:e25665. doi: 10.7554/eLife.25665 (PMC5468087; doi:10.7554/eLife.25665)
Supplement: Figure 1—source data 1. — DOI: http://dx.doi.org/10.7554/eLife.25665.003 [file elife-25665-fig1-data1.xlsx]

## Sheet: Fig 1c
			Number of spikes baseline (average of 2 trials)								Number of spikes with DHPG (average of 2 trials)
		Current injection (pA)	Cell 1	Cell 2	Cell 3	Cell 4	Cell 5	Cell 6			Cell 1	Cell 2	Cell 3	Cell 4	Cell 5	Cell 6					Current injection (pA)	Mean number of spikes- baseline (n=6)	Mean number of spikes- DHPG (n=6)
		50	0	0	0	0	0	0			0	2	0	0	0	0					50	0	0
		60	0	0	0	0	0	0			0	2	0	0	0	0					60	0	0
		70	0	0	0	0	0	0			0	2	0	0	0	0					70	0	0
		80	0	0	0	0	0	0			0.5	2.5	0	0	1	0					80	0	0
		90	0	0	0	0	0	0			1	3.5	0	0	2	0					90	0	0
		100	0	1	0	0	0	0			1.5	4.5	0	0	3	0					100	0.166667	1.5
		110	0	1	0	0	0	0			3	5	0	0	3	1					110	0.166667	2
		120	1	1	0	0	1	0			3.5	6	0	0	3	2					120	0.5	2.41667
		130	1.5	2.5	0	0	1	0			4.5	6	0	0	4	3					130	0.833333	2.91667
		140	1.5	2.5	0	0	2	0			5	7	3	0	5	3					140	1	3.83333
		150	2.5	3	3	0	2	1			6	7	5	2	5	4					150	1.91667	4.83333
		160	2.5	3.5	3	1	3	1			6.5	7	6	2	6	4					160	2.33333	5.25
		170	3.5	4	4	1	3	2			6.5	8	7	3	6	4					170	2.91667	5.75
		180	4	4	5	1	4	3			6.5	8	7	3	6	5					180	3.5	5.91667
		190	4.5	5	5	2	4	3			7	9	7	4	6	5					190	3.91667	6.33333
		200	4.5	5.5	6	2	5	4			7.5	9.5	8	4	6	5					200	4.5	6.66667
		210	5.5	6	7	3	5	4			7.5	10	9	5	7	6					210	5.08333	7.41667
		220	6	6.5	7	3	6	5			8	10.5	9	5	7	6					220	5.58333	7.58333
		230	6	7	7	3	6	6			8.5	10.5	9	6	7	6					230	5.83333	7.83333
		240	7	7.5	8	3	6	6			8.5	11	10	6	7	7					240	6.25	8.25
		250	7	8	8	4	7	6			8.5	11	10	6	8	7					250	6.66667	8.41667
		260	7	8	8	5	7	6			8.5	11	10	6	8	7					260	6.83333	8.41667
		270	8	9	9	6	7	7			9	12	10	7	8	8					270	7.66667	9
		280	8	9	9	6	7	7			9	12	10	7	8	8					280	7.66667	9
		290	8	9.5	10	6	7	7			9	12	10	8	8	8					290	7.91667	9.16667
		300	8.5	10	10	6	8	7			9	12	11	8	8	8					300	8.25	9.33333

## Sheet: Fig1e
					sEPSC Frequency (Hz)
					Baseline	DHPG	Washout
				Cell 1	3.18333	5.76667	3.21667
				Cell 2	1.07667	1.74333	1.62667
				Cell 3	1.89667	2.69	2.77667
				Cell 4	1.36333	7.12	3.49333
				Cell 5	2.04667	2.97	3.44667
				Cell 6	3.21333	4.08333	4.57667
				Cell 7	2.81	4.91667	3.42667

## Sheet: Fig 1g
					mEPSC Frequency (Hz)
					Baseline	DHPG	Washout
				Cell 1	0.52	0.956667	0.533333
				Cell 2	1.56	0.996667	1.14667
				Cell 3	0.753333	0.893333	1.46333
				Cell 4	1.19667	1.65667	2.24667
				Cell 5	1.29667	1.83333	1.44333
				Cell 6	1.533	2.653	1.63667
				Cell 7	1.2733	2.1	1.08667
				Cell 8	2.1	3.8	2.77667
				Cell 9	0.52	1.67	1.69
				Cell 10	0.35	2.45	1.94333
				Cell 11	0.3433	3.38	0.813333
				Cell 12	2.6033	3.343	3.05333
