# Supplementary material for: Activation of the same mGluR5 receptors in the amygdala causes divergent effects on specific versus indiscriminate fear
Source: eLife. 2017 May 30;6:e25665. doi: 10.7554/eLife.25665 (PMC5468087; doi:10.7554/eLife.25665)
Supplement: Figure 2—figure supplement 1—source data 1. — DOI: http://dx.doi.org/10.7554/eLife.25665.007 [file elife-25665-fig2-figsupp1-data1.xlsx]

## Sheet: Fig2-supplement 1b
		Percentage Freezing
		Habituation Day3 CS-	Habituation Day3 CS+	Testing Day4 CS-	Testing Day4 CS+	Habituation Day4 CS-	Habituation Day4 CS+	Testing Day5 CS-	Testing Day5 CS+
	Animal 1	10.1567	14.82	11.5367	12.3567	28.8333	43.1833	3.66	30.3433
	Animal 2	19.09	16.5533	20.6533	32.19	31.5233	43.0667	3.85667	19.0533
	Animal 3	5.99333	0.356667	17.0267	15.57	22.4533	38.6267	9.07	6.06667
	Animal 4	9.08333	3.44667	6.82667	11.7667	15.8333	43.72	10.9567	13.6833
	Animal 5	4.58	3.71333	7.36667	21.7833	0.306667	20.8767	3.52667	6.84333
	Animal 6	10.29	14.4233	8.48333	13.7667	15.3433	20.6933	1.07	8.97667
	Animal 7	2.55	5.82	6.76667	17.38	5.42	13.82	4.54667	17.54

## Sheet: Fig2-supplement 1c
		Percentage Freezing
		Habituation Day3	Testing Day4	Habituation Day4	Testing Day5
	Animal 1	10.6	2.25	20.79	8.35
	Animal 2	0	4.9	6.69	0
	Animal 3	11.88	0	0	2.73
	Animal 4	0	10.81	3	3.71
	Animal 5	0	0	0	0
	Animal 6	8.86	0	6.72	3.61
	Animal 7	0	3.48	0	2.94
