# Supplementary material for: Activation of the same mGluR5 receptors in the amygdala causes divergent effects on specific versus indiscriminate fear
Source: eLife. 2017 May 30;6:e25665. doi: 10.7554/eLife.25665 (PMC5468087; doi:10.7554/eLife.25665)
Supplement: Figure 2—figure supplement 2—source data 1. — DOI: http://dx.doi.org/10.7554/eLife.25665.009 [file elife-25665-fig2-figsupp2-data1.xlsx]

## Sheet: Fig 2- supplement 2c
		Percentage Freezing
		First Trial			Last Trial
		Pretone	CS-	CS+	Pretone	CS-	CS+
	Animal 1	35.7	7.65	12.99	41.18	63.6	66.8
	Animal 2	13.76	5.1	8.95	70.38	72.95	71.75
	Animal 3	44.41	46.67	42.44	37.49	93.89	91
	Animal 4	55.1	12.92	57.33	92.19	59.74	90.81
	Animal 5	19.45	54.3	82.98	84.52	98.18	83.47
	Animal 6	71.23	19.91	73.18	91.15	87.95	90.78
	Animal 7	28.32	74.07	81.89	42.13	84.32	91.65
	Animal 8	74.41	46.67	57.33	87.49	93.89	90.81
