# Supplementary material for: Activation of the same mGluR5 receptors in the amygdala causes divergent effects on specific versus indiscriminate fear
Source: eLife. 2017 May 30;6:e25665. doi: 10.7554/eLife.25665 (PMC5468087; doi:10.7554/eLife.25665)
Supplement: Figure 2—source data 1. — DOI: http://dx.doi.org/10.7554/eLife.25665.005 [file elife-25665-fig2-data1.xlsx]

## Sheet: Fig 2c
		Percentage Freezing
		Habituation Day3 CS-	Habituation Day3 CS+	Testing Day4 CS-	Testing Day4 CS+	Habituation Day4 CS-	Habituation Day4 CS+	Testing Day5 CS-	Testing Day5 CS+
	Animal 1	17.4	9.39667	15.37	32.9133	42.74	85.7633	16.0067	42.1833
	Animal 2	20.6667	16.7567	5.27667	5.94	25.2333	77.2333	19.2833	51.89
	Animal 3	12.91	14.39	18.7433	6.45667	73.3667	76.27	9.17	19.79
	Animal 4	11.2233	11.65	7.62	13.4667	67.4333	41.8033	8.30333	36.7733
	Animal 5	3.36667	5.26667	5.88667	4.51	9.45667	34.8	19.3	17.0667
	Animal 6	8.39333	8.42	11.88	14.0233	54.3233	26.8633	7.34667	23.0633
	Animal 7	0	0	18.4	11.21	13.86	14.6967	26.9	51.31
	Animal 8	6.604	7.04	4.696	26.9833	28.53	32.9233	10.058	23.31

## Sheet: Fig 2d
		Percentage Freezing
		Habituation Day3	Testing Day4	Habituation Day4	Testing Day5
	Animal 1	4.43	4.22	41.34	0
	Animal 2	14.36	2.19	76.74	2.75
	Animal 3	0	4.88	74.6	16.9
	Animal 4	17	3.59	0	5.61
	Animal 5	7.08	0	20.88	4.52
	Animal 6	3.08	17.3	6.738	2.44
	Animal 7	0	2.59	6.95	0
	Animal 8	3.21	9.21	42.793	9.64
