# Supplementary material for: Activation of the same mGluR5 receptors in the amygdala causes divergent effects on specific versus indiscriminate fear
Source: eLife. 2017 May 30;6:e25665. doi: 10.7554/eLife.25665 (PMC5468087; doi:10.7554/eLife.25665)
Supplement: Figure 3—source data 1. — DOI: http://dx.doi.org/10.7554/eLife.25665.011 [file elife-25665-fig3-data1.xlsx]

## Sheet: Fig 3 Panel b
			DHPG-Average EPSP slope (%baseline)														Weak Pairing- Average EPSP slope (%baseline)														Weak Pairing + DHPG - Average EPSP slope (%baseline)
		Time (min)	Cell 1	Cell 2	Cell 3	Cell 4	Cell 5	Cell 6	Cell 7	Cell 8	Cell 9	Cell 10	Cell 11				Cell 1	Cell 2	Cell 3	Cell 4	Cell 5	Cell 6	Cell 7	Cel 8	Cell 9	Cell 10	Cell 11				Cell 1	Cell 2	Cell 3	Cell 4	Cell 5	Cell 6	Cell 7	Cell 8	Cell 9	Cell 10	Cell 11	Cell 12
	Baseline	1	84.3854	85.6918	81.1622	104.517	104.396	107.343	86.5612	91.6348	68.4601	81.3175	112.767				79.4503	79.4052	107.622	93.6721	114.737	109.342	108.009	88.0629	72.7262	70.49	103.007				69.1736	99.5041	90.8745	79.6012	103.032	96.1424	113.052	109.408	78.3067	125.812	92.6674	92.638
		2	79.0249	89.0044	78.3708	103.178	111.25	123.481	96.1157	97.7085	56.6173	82.7315	89.3141				94.4608	96.0861	92.1028	92.4986	95.7146	129.375	104.485	104.547	97.662	100.018	94.458				125.543	102.222	105.834	84.8848	113.621	64.4725	109.63	86.4335	78.4068	147.563	76.0023	79.3004
		3	97.3473	108.132	119.848	92.9552	97.1104	120.042	106.227	107.799	104.556	111.931	93.7266				99.1319	102.994	89.6234	93.6357	85.3783	74.9776	94.2525	108.543	114.231	104.633	108.245				104.767	93.086	128.334	94.4268	101.708	123.563	106.209	101.438	77.2015	146.507	111.605	88.5746
		4	97.0991	108.124	71.5263	101.564	96.3955	93.1569	104.139	91.2745	96.3925	122.267	92.7729				97.275	94.6574	84.7567	113.999	92.6035	65.9134	83.605	101.141	107.418	137.289	86.0082				81.356	101.853	86.1372	94.4158	81.7301	67.0954	84.7091	135.357	90.4196	94.672	96.2025	92.7901
		5	103.298	119.673	80.62	84.7766	100.503	85.1951	89.368	109.972	169.429	92.2086	111.419				129.682	126.857	125.895	106.195	111.566	120.392	109.648	106.51	107.962	87.5704	108.282				112.392	103.334	88.8202	146.671	99.909	105.361	86.3996	67.3632	146.774	61.2629	123.523	146.697
		6	126.643	97.1116	119.253	97.3461	94.2392	100.609	88.4102	105.743	100.289	112.064	103.51
		7	96.5781	109.543	161.105	118.46	92.3382	91.3389	95.5419	97.2525	116.532	110.272	83.2083
		8	108.504	108.157	144.034	99.9567	113.242	84.511	106.205	83.7273	124.644	91.5914	88.0388
		9	116.217	104.128	75.5683	100.577	103.499	86.1455	115.785	98.6621	94.9081	98.3919	123.446
		10	90.9033	70.4345	68.5132	96.6674	87.0276	108.177	111.648	116.226	68.1714	96.5488	107.003
	Post-LTP	11	97.2854	106.347	64.731	88.2388	88.0206	110.326	142.365	122.745	65.5432	55.2484	120.675				209.437	198.959	96.235	689.674	126.865	343.529	227.31	229.084	388.305	408.493	85.139				90.2255	121.835	88.2793	118.963	292.018	469.515	225.376	272.654	219.077	621.313	260.681	98.2362
		12	84.2851	84.1558	67.711	106.619	86.0119	108.061	118.071	106.474	76.1802	78.7757	117.471				199.781	188.431	120.569	443.433	111.956	275.99	155.631	174.726	223.912	250.724	94.8192				111.4	108.819	90.6578	136.158	273.998	456.275	95.2568	285.98	208.922	426.962	260.428	62.4052
		13	90.8623	99.2301	76.4222	94.2744	90.2164	81.9158	91.7673	93.1398	101.814	102.528	87.8963				176.694	166.897	138.476	280.185	117.788	274.326	168.26	143.695	147.698	179.376	92.9963				52.7146	106.636	91.8553	102.693	245.447	328.747	142.034	203.09	208.185	491.55	264.519	32.1385
		14	77.915	83.1404	55.5754	91.6524	82.7948	99.5679	97.5532	99.9342	84.0549	107.538	84.3829				148.329	140.169	70.2478	263.099	87.3376	244.076	149.373	143.97	177.048	167.337	95.5263				56.6553	134.741	73.5957	111.307	282.279	284.069	171.777	200.18	199.909	312.926	219.018	77.8673
		15	70.4584	96.5958	134.833	94.2296	83.9977	96.8095	76.3347	93.691	92.2079	89.6585	73.9666				180.971	174.318	104.592	177.333	170.447	206.892	154.174	137.472	186.773	195.363	69.7014				103.531	118.963	87.7034	119.312	226.791	286.612	123.579	292.654	161.211	366.286	179.123	107.865
		16	73.5397	117.18	113.078	82.2919	91.266	103.908	79.7192	109.538	85.7761	101.755	92.477				161.668	157.192	77.9614	223.553	167.369	233.653	120.201	171.373	147.21	119.137	104.814				247.833	133.855	322.551	177.805	258.86	324.816	132.491	274.782	244.636	336.985	215.533	71.7129
		17	84.4843	96.0795	59.1875	95.5766	85.3651	93.5641	61.6933	126.253	78.025	92.9482	97.8462				132.395	128.042	72.5436	198.781	177.631	132.887	154.847	150.318	182.449	85.1448	97.999				193.624	131.351	336.927	145.312	269.752	212.599	81.222	185.533	237.469	468.782	168.316	118.808
		18	95.8131	92.3505	104.048	104.315	94.5738	100.438	84.5086	111.319	68.9033	91.1174	85.5879				114.074	111.76	86.4096	194.197	205.765	145.224	137.658	131.222	190.799	122.409	132.21				198.012	145.979	296.563	145.59	256.352	334.215	64.7791	255.534	246.941	445.623	219.927	113.867
		19	75.2958	81.3175	65.3966	94.3493	101.224	94.2611	58.3695	109.241	48.7116	93.447	119.713				203.579	202.373	87.2361	107.585	174.554	197.167	111.988	150.184	182.687	120.019	94.4578				166.599	146.928	218.875	246.524	232.778	283.691	74.0829	228.131	225.288	493.349	238.258	79.3345
		20	69.4482	82.766	86.7627	86.2837	87.4191	106.903	71.5966	94.2423	75.2835	98.1182	84.0739				127.863	125.181	108.081	166.407	174.406	118.786	142.962	129.516	160.158	174.997	93.8974				143.218	117.447	138.118	190.777	277.634	237.644	76.8673	261.586	211.753	433.73	210.534	96.4319
		21	90.6568	82.0584	82.0934	95.9176	84.5423	91.7025	71.436	116.597	91.1254	115.675	98.6564				98.1263	94.6958	90.7253	199.736	204.661	200.434	161.996	148.356	146.368	118.866	97.5223				173.36	140.191	129.431	180.544	252.834	234.176	67.4452	224.113	143.082	567.053	190.082	111.928
		22	82.9413	112.273	81.1329	89.9424	79.9578	100.335	89.5246	102.751	99.8144	129.688	112.988				93.6004	89.0355	110.101	135.785	183.901	111.471	138.906	145.935	160.453	176.927	83.3001				93.8014	144.248	161.17	203.927	274.025	193.791	76.77	198.393	222.2	384.438	192.708	47.533
		23	91.4337	99.7629	101.996	99.141	92.798	87.1057	91.1172	99.9659	74.3558	106.598	114.799				97.1955	94.6034	93.7558	151.33	189.995	151.182	132.901	149.666	183.989	141.184	84.5521				107.945	110.485	183.501	215.282	275.505	243.816	94.4167	213.646	261.23	543.816	222.604	108.218
		24	89.0951	97.8152	100.283	101.695	84.7069	100.719	72.2429	78.915	135.621	103.304	120.148				107.718	104.47	96.6022	132.649	136.178	132.454	137.3	132.794	176.179	218.486	99.12				149.351	130.844	80.7006	242.156	310.743	217.893	61.9543	240.847	298.933	540.959	206.141	102.216
		25	107.151	107.803	143.436	100.672	85.4558	86.8026	61.2781	128.151	111.255	106.978	129.533				160.217	153.304	121.258	132.98	170.581	147.598	133.079	111.11	148.867	157.505	93.2685				98.4808	116.931	69.7408	177.38	282.262	271.033	74.0617	214.89	297.262	447.735	228.967	77.3616
		26	89.5606	127.468	147.57	104.187	87.9354	99.3145	74.0528	91.974	82.6737	121.318	119.645				162.672	157.989	102.479	142.878	182.446	142.797	112.744	143.243	158.589	144.664	97.3336				161.417	105.63	65.77	203.174	296.46	323.035	90.9362	237.316	289.231	521.986	236.138	134.843
		27	88.641	123.26	149.345	99.985	87.5155	111.917	100.466	115.314	118.048	117.068	119.572				110.219	106.842	115.243	129.285	169.679	135.527	111.969	133.94	142.493	189.767	110.969				92.9158	115.352	81.4306	192.697	329.869	319.316	93.0437	254.508	279.974	540.529	231.795	132.904
		28	84.76	94.9182	114.178	90.2206	94.591	99.9848	94.4333	105.51	67.6768	132.647	113.559				140.635	137.158	118.733	143.43	166.022	145.177	109.556	140.09	157.977	157.406	98.334				107.316	91.1854	85.6511	240.727	274.805	363.681	62.331	228.559	291.995	455.52	195.081	102.081
		29	81.1185	90.1157	140.469	108.077	87.3	102.894	109.752	113.809	107.205	102.548	85.5343				75.3811	70.3115	94.3067	137.698	148.878	137.009	127.602	125.603	145.132	135.039	83.8502				111.583	134.89	118.166	190.831	282.454	375.09	59.4575	154.99	310.883	386.433	248.864	83.0778
		30	89.9511	79.2034	128.211	110.412	88.9851	98.2138	116.917	127.26	129.118	118.568	101.183				98.6025	91.3334	71.0743	153.395	172.541	152.724	122.577	114.758	165.615	139.426	95.6993				122.855	93.4584	79.9724	204.13	129.504	333.252	79.8549	173.859	333.18	608.012	216.695	105.335
		31	80.5817	88.0349	101.243	86.1093	74.4313	96.9429	94.7465	97.7507	119.46	104.015	113.174				81.2367	76.469	125.803	84.5524	152.864	114.352	104.34	124.204	129.63	99.1248	95.914				124.864	110.831	117.717	149.722	273.936	397.112	89.419	231.657	295.017	470.191	239.673	120.881
		32	99.3445	108.265	132.841	96.658	82.6926	117.844	100.401	122.904	93.5888	108.057	92.5445				63.1517	58.0099	99.2655	110.072	196.964	118.6	111.551	134.536	114.612	133.957	86.1971				123.5	122.504	82.7226	210.864	280.127	314.804	41.2691	221.219	308.223	499.609	265.125	105.909
		33	91.1154	99.6047	154.628	90.8305	87.368	92.2396	121.403	118.081	109.091	133.799	125.383				115.953	111.176	99.3572	102.635	281.885	109.346	145.842	139.893	134.793	115.685	78.2712				123.954	122.722	68.4685	242.162	346.145	434.453	89.0678	220.349	321.506	530.905	170.589	78.8453
		34	86.5884	112.698	112.895	102.323	92.4009	106.019	99.9214	92.9068	150.959	122.042	84.1576				87.6459	82.6105	104.224	160.086	230.411	70.85	99.4951	109.062	160.782	156.159	96.5532				117.862	88.3435	151.967	232.73	280.195	401.905	101.326	270.878	353.61	625.225	211.342	145.23
		35	78.6649	86.8696	117.572	72.6659	81.7337	133.051	104.368	131.405	126.891	124.612	73.336				73.6411	69.8208	118.641	123.132	161.484	160.22	138.541	121.488	169.684	144.608	100.257				116.099	110.848	110.099	246.004	288.654	391.041	63.8372	253.305	356.588	616.025	249.677	111.106
		36	80.384	56.251	133.979	91.8111	86.1651	96.5794	111.805	89.0165	90.4967	114.273	89.3203				50.2629	47.1527	80.9917	131.057	193.84	103.034	150.87	145.131	124.694	139.264	105.427				97.9254	114.448	128.962	209.332	274.418	398.493	61.7279	256.295	365.094	629.288	253.007	112.042
		37	69.8468	97.3489	108.972	87.1467	82.443	104.211	99.1908	89.504	145.156	116.132	61.5935				57.4306	54.5408	104.224	130.626	187.328	163.526	144.408	114.684	127.021	187.992	99.775				98.1108	130.74	108.707	231.863	301.829	212.295	61.5142	314.456	351.832	600.188	195.081	141.554
		38	90.3417	81.2055	135.051	81.9037	92.3327	135.176	91.1288	110.025	123.263	90.8436	70.5782				82.0042	83.3491	111.846	164.436	197.901	126.561	142.079	128.307	129.453	165.688	103.468				88.0474	121.967	126.82	247.62	320.419	238.718	50.6595	265.614	318.481	541.038	260.883	118.403
		39	89.21	83.9729	134.18	94.8553	100.51	103.567	92.3688	108.7	132.993	110.619	75.8886				72.5978	70.9711	107.53	99.3637	188.015	100.384	106.269	122.051	146.028	115.67	93.1324				55.252	111.103	161.034	244.273	238.215	308.166	56.6328	281.063	389.446	630.507	219.321	144.286
